# Supplementary material for: Red Ginseng Attenuates Aβ-Induced Mitochondrial Dysfunction and Aβ-mediated Pathology in an Animal Model of Alzheimer’s Disease
Source: Int J Mol Sci. 2019 Jun 21;20(12):3030. doi: 10.3390/ijms20123030 (PMC6627470; doi:10.3390/ijms20123030)
Supplement: Supplementary file 1 [file ijms-20-03030-s001.pdf]

## Supplementary Materials

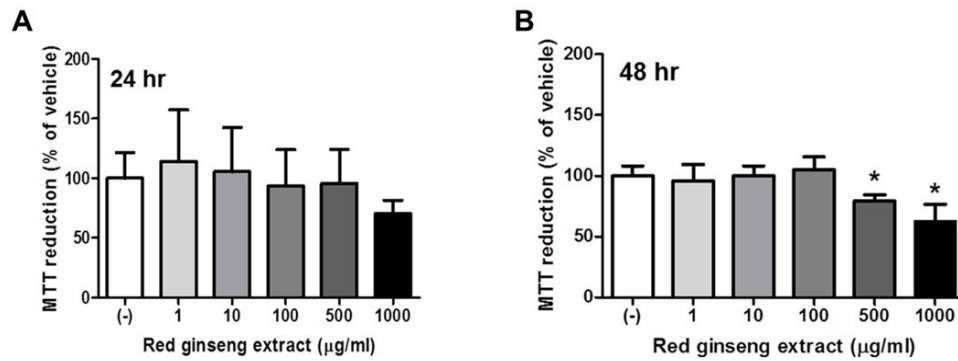

**Supplementary Figure 1.** Cytotoxicity of RGE to the HT22 cell line. HT22 hippocampal neuronal cells were treated with various concentrations of RGE (1, 10, 100, 500, and 1000 μg/ml) for 24 h (A) and 48 h (B). \* $p < 0.05$  compared with the vehicle-treated group.

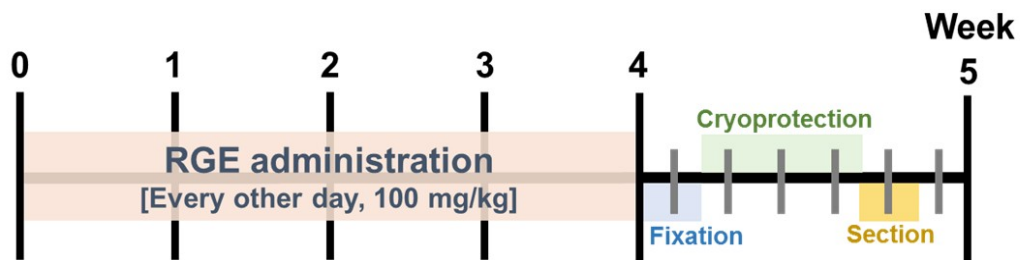

**Supplementary Figure 2.** The experimental design for evaluation of RGE in 5XFAD mice. Oral administration was performed for treatment with vehicle or RGE every other day for 4 weeks. At 24 h after the last administration, WT and 5XFAD mice were sacrificed and brain sections were analyzed by histological staining.
